# Supplementary material for: Efficacy of 1, 5, and 20 mg oral sildenafil in the treatment of adults with pulmonary arterial hypertension: a randomized, double-blind study with open-label extension
Source: Springer Nature journal article supplement (doi:10.1186/s12890-017-0374-x), 2017-02-22
Supplement: MOESM1 [file 12089772]

## A4 LIST OF INVESTIGATORS AND CORRESPONDING ETHICS COMMITTEES OR INSTITUTIONAL REVIEW BOARDS

### Belgium

#### Coordinating Investigators:

<None Entered>

| <u>Center</u> | <u>Principal Investigator</u> | <u>Co-Investigator(s)</u> | <u>Sub-Investigator(s)</u>             | <u>Address(es)</u>                                                                                                    | <u>Institutional Review Board or Ethics Committee Address(es)</u>                                                                                                                                                                                                                                                        |
|---------------|-------------------------------|---------------------------|----------------------------------------|-----------------------------------------------------------------------------------------------------------------------|--------------------------------------------------------------------------------------------------------------------------------------------------------------------------------------------------------------------------------------------------------------------------------------------------------------------------|
| 1033 *        | Prof. Marion Delcroix         |                           |                                        | Universitaire Ziekenhuizen<br>Leuven - Campus Gasthuisberg<br>Pneumologie<br>Herestraat 49<br>Leuven, 3000<br>BELGIUM | Commissie Medische Ethiek van de<br>Universitaire Ziekenhuizen<br>KULeuven<br>U.Z. Gasthuisberg E330<br>Herestraat 49<br>Leuven, 3000<br>BELGIUM<br><br>Universitaire Ziekenhuizen Leuven -<br>Campus Gasthuisberg<br>Commissie voor Medische Ethiek /<br>Klinisch Onderzoek<br>Herestraat 49<br>Leuven, 3000<br>BELGIUM |
| 1034 *        | Prof. Robert Naeije           |                           | Sandrine Huez<br>Dr. Jean-luc Vachiery | Hopital Erasme / Service de<br>Cardiologie<br>Route de Lennik, 808<br>Bruxelles, 1070<br>BELGIUM                      | Universitaire Ziekenhuizen Leuven -<br>Campus Gasthuisberg<br>Commissie voor Medische Ethiek /<br>Klinisch Onderzoek<br>Herestraat 49<br>Leuven, 3000<br>BELGIUM                                                                                                                                                         |

**Brazil****Coordinating Investigators:**

&lt;None Entered&gt;

| <u>Center</u> | <u>Principal Investigator</u>      | <u>Co-Investigator(s)</u> | <u>Sub-Investigator(s)</u>                                                                                                                                                                                                                                 | <u>Address(es)</u>                                                                                                                            | <u>Institutional Review Board or Ethics Committee Address(es)</u>                                                                                                               |
|---------------|------------------------------------|---------------------------|------------------------------------------------------------------------------------------------------------------------------------------------------------------------------------------------------------------------------------------------------------|-----------------------------------------------------------------------------------------------------------------------------------------------|---------------------------------------------------------------------------------------------------------------------------------------------------------------------------------|
| 1028          | Dr. Maria Virginia Tavares Santana |                           | Dr. Maria E. M. Albrecht<br>Dr. Thais T. Costa<br>Dr. Almir S. Ferraz<br>Luis C P Lima<br>Dr. Ricardo F. Martins<br>Dr. Romeu S. Meneghelo<br>Dr. Marly A. Miaira<br>Fernando A Moreira<br>Dr. Carlos Augusto Cardoso Pedra<br>Dr. Sérgio C. Pontes Júnior | Instituto Dante Pazzanese de Cardiologia<br>Av Doutor Dante Pazzanese, 500 - Predio I<br>Vila Mariana<br>Sao Paulo, SP 04012-909<br>BRAZIL    | Comite de Etica em Pesquisa do Instituto Dante Pazzanese de Cardiologia<br>Av Doutor Dante Pazzanese, 500<br>6° andar - Torre - Ibirapuera<br>Sao Paulo, SP 04012-180<br>BRAZIL |
| 1029          | Jose Miguel Chatkin                |                           | Dr. Daniela Cavalet Blanco<br>Dr Paulo Ricardo Avancini Caramori<br>Dr. Gustavo Chatkin<br>Leandro Genehr Fritscher<br>Fabio Maraschin Haggstram<br>Dr Flavio Jose Petersen Velho                                                                          | Hospital São Lucas da PUCRS<br>Av. Ipiranga, 6690 - 4 andar<br>Bairro Azenha<br>Porto Alegre, RS 90610-000<br>BRAZIL                          | Comite de Etica em Pesquisa em Seres Humanos da PUCRS<br>Av: Ipiranga, 6690 - 3° andar<br>Bairro Azenha<br>Porto Alegre, RS 90610-000<br>BRAZIL                                 |
| 1091 *        | Dr. Frederico T. A. F. Campos      |                           | Virginia Pacheco Guimarães<br>Eliane Viana Mancuzo<br>Edmundo C. Oliveira                                                                                                                                                                                  | Hospital Madre Teresa<br>Departamento de Pneumologia<br>Av. Raja Gabaglia, 1002<br>Bairro Gutierrez<br>Belo Horizonte, MG 30380-090<br>BRAZIL | Comitê de Ética em Pesquisa do Hospital Madre Teresa<br>Av. Raja Gabaglia, 1002<br>Bairro Gutierrez<br>Belo Horizonte, MG 30380-090<br>BRAZIL                                   |

\* Did not randomize subjects

**Bulgaria****Coordinating Investigators:**

&lt;None Entered&gt;

| <u>Center</u> | <u>Principal Investigator</u> | <u>Co-Investigator(s)</u> | <u>Sub-Investigator(s)</u>                                          | <u>Address(es)</u>                                                                                                              | <u>Institutional Review Board or Ethics Committee Address(es)</u>                                                                                                                                                               |
|---------------|-------------------------------|---------------------------|---------------------------------------------------------------------|---------------------------------------------------------------------------------------------------------------------------------|---------------------------------------------------------------------------------------------------------------------------------------------------------------------------------------------------------------------------------|
| 1069 *        | D-r Georgi Grigorov           |                           | Todor Draganov<br>Dr. Mima Njagina<br>Dr. Georgi Todorov            | Vtora mnogoprofilna bolnitsa za aktivno lechenie, Klinika po kardiologia<br>bul. "Hristo Botev" 120<br>Sofia, 1202<br>BULGARIA  | 2nd Multifunctional Hospital for Active Treatment, Sofia<br>Ethics Committee<br>120 Hristo Botev Blvd.<br>Sofia, 1202<br>BULGARIA<br><br>Ethics Committee for Multicenter Trials<br>ul. "Damyanev" 8<br>Sofia, 1303<br>BULGARIA |
| 1070 *        | Dr. Sotir Todorov<br>Marchev  |                           | Dr. Bojidar Ivanov<br>Dimov<br>Ventsislav Mirchev<br>Vera Rangelova | Peta mnogoprofilna bolnitsa za aktivno lechenie, Klinika po kardiologia<br>bul. General Stoletov 67A<br>Sofia, 1233<br>BULGARIA | 5th Multifunctional Hospital for Active Treatment, Sofia<br>Ethics Committee<br>67A Stoletov Blvd.<br>Sofia, 1233<br>BULGARIA<br><br>Ethics Committee for Multicenter Trials<br>ul. "Damyanev" 8<br>Sofia, 1303<br>BULGARIA     |

| <u>Center</u> | <u>Principal Investigator</u> | <u>Co-Investigator(s)</u> | <u>Sub-Investigator(s)</u>                                                                                                                                                                       | <u>Address(es)</u>                                                                                                                                                                                    | <u>Institutional Review Board or Ethics Committee Address(es)</u>                                                                                                                                                                                                                                                                          |
|---------------|-------------------------------|---------------------------|--------------------------------------------------------------------------------------------------------------------------------------------------------------------------------------------------|-------------------------------------------------------------------------------------------------------------------------------------------------------------------------------------------------------|--------------------------------------------------------------------------------------------------------------------------------------------------------------------------------------------------------------------------------------------------------------------------------------------------------------------------------------------|
| 1073 *        | Dr. Zlatka Iankova            |                           | Dr. Milena Dimitrova<br>Anna Kostova Kostova<br>Dr. Neli Boyanova<br>Manolova<br>Dots. Stoyan Milanov<br>Dots. Maria Hristova<br>Milanova<br>Diana Slaveva Mladenova<br>MD<br>Dimitar Tsachev MD | Mnogoprofilna bolnitsa za aktivno lechenie i speshna meditsina "N.I.Pirogov"<br>Klinika po speshni vatreshni bolesti, Otdelenie po pulmologia<br>bul. General Totoleben 21<br>Sofia, 1606<br>BULGARIA | Ethics Committee at Mnogoprofilna bolnitsa za aktivno lechenie i speshna meditsina "N.I.Pirogov"<br>Mnogoprofilna bolnitsa za aktivno lechenie i speshna meditsina "N.I.Pirogov"<br>bul. General Tottleben 21<br>Sofia, 1606<br>BULGARIA<br><br>Ethics Committee for Multicenter Trials<br>ul. "Damyam Gruev" 8<br>Sofia, 1303<br>BULGARIA |
| 1076 *        | Dr. Borislav Georgiev         |                           | Elena Kostova                                                                                                                                                                                    | Spetsializirana bolnitsa za aktivno lechenie na sardechno-sadovi zabolyavania Klinika po kardiologia<br>ul. Konyovitsa 65<br>Sofia, 1309<br>BULGARIA                                                  | Ethics Committee at Specialized Hospital for Active Treatment of Cardio-Vascular Diseases<br>65 Koniovitza Street<br>Sofia, 1309<br>BULGARIA<br><br>Ethics Committee for Multicenter Trials<br>ul. "Damyam Gruev" 8<br>Sofia, 1303<br>BULGARIA                                                                                             |

**China****Coordinating Investigators:**Lizhi Dai  
Xin Jiang

| <u>Center</u> | <u>Principal Investigator</u> | <u>Co-Investigator(s)</u> | <u>Sub-Investigator(s)</u>         | <u>Address(es)</u>                                                                                                                              | <u>Institutional Review Board or Ethics Committee Address(es)</u>                                                                                 |
|---------------|-------------------------------|---------------------------|------------------------------------|-------------------------------------------------------------------------------------------------------------------------------------------------|---------------------------------------------------------------------------------------------------------------------------------------------------|
| 1101          | Prof. Zhicheng Jing           |                           | Dong Liu<br>Xiqi Xu<br>Qinhua Zhao | Shanghai Pulmonology Hospital<br>Department of Pulmonary<br>Circulation<br>No.507 Zhengmin Road Yangpu<br>District<br>Shanghai, 200433<br>CHINA | Ethic committee of Shanghai<br>Pulmonary Hospital, Tongji<br>University<br>No. 507 Zhengmin Road, Yangpu<br>District<br>shanghai, 200433<br>CHINA |
| 1102          | Yong Wang                     |                           | Lina Jia<br>Zhihua Shi             | Beijing Shijitan Hospital<br>Respiration Department<br>No.10, Yangfangdian Tiejeyuan<br>Road, Haidian District<br>Beijing, 100038<br>CHINA      | Ethic committee of Beijing Shijitan<br>Hospital<br>No.10 Yangfangdian Tiejeyuan<br>Road, Haidian District<br>Beijing, 100038<br>CHINA             |

090177e181b842ab\Approved\Approved On: 17-Mar-2011 06:18

**Denmark****Coordinating Investigators:**

&lt;None Entered&gt;

| <u>Center</u> | <u>Principal Investigator</u> | <u>Co-Investigator(s)</u> | <u>Sub-Investigator(s)</u> | <u>Address(es)</u>                                                                          | <u>Institutional Review Board or Ethics Committee Address(es)</u>                                                         |
|---------------|-------------------------------|---------------------------|----------------------------|---------------------------------------------------------------------------------------------|---------------------------------------------------------------------------------------------------------------------------|
| 1001 *        | Dr. Jorn Carlsen              |                           |                            | Hjertecentret Afs 2142<br>H S Rigshospitalet<br>Blegdamsvej 9<br>Kobenhavn, 2100<br>DENMARK | De Videnskabetiske Komitéer for<br>Region Hovedstaden<br>Regionsgaarden<br>Kongens Vaenge 2<br>Hilleroed, 3400<br>DENMARK |

090177e181b842ab\Approved\Approved On: 17-Mar-2011 06:18

## Greece

## Coordinating Investigators:

&lt;None Entered&gt;

| <u>Center</u> | <u>Principal Investigator</u>  | <u>Co-Investigator(s)</u> | <u>Sub-Investigator(s)</u>                                                                                                                                                                                                                                          | <u>Address(es)</u>                                                                                                               | <u>Institutional Review Board or Ethics Committee Address(es)</u>           |
|---------------|--------------------------------|---------------------------|---------------------------------------------------------------------------------------------------------------------------------------------------------------------------------------------------------------------------------------------------------------------|----------------------------------------------------------------------------------------------------------------------------------|-----------------------------------------------------------------------------|
| 1060          | Assoc. Prof. Stylianos Orfanos |                           | Dr. Anastasia Anthi<br>Assoc. Prof. Apostolos Armaganidis<br>Dr. Effrosyni Dimitriadou<br>John P. Lekakis<br>Dr. Panagiotis Lympelopoulos<br>Dr. Effrosyni Manali<br>Dr. Fotis Panou<br>Dr. Loukianos Rallidis<br>Dr. Helen Triantafyllidi<br>Dr. Iraklis Tsagkaris | Attikon Hospital<br>Second Critical Care Department,<br>University of Athens<br>1, Rimini St.<br>Haidari, Athens 12462<br>GREECE | National Ethics Committee<br>284 Mesogion Avenue<br>Athens, 15562<br>GREECE |
| 1061 *        | Dr. Athanassios Manginas       |                           | Prof. Dennis Cokkinos<br>Dr. Panagiotis Karyofyllis<br>Dr. Sofia Thomopoulou                                                                                                                                                                                        | Onassis Cardiac Surgery Center<br>1st Cardiology Clinic<br>356 Sygrou Avenue<br>Kallithea, Athens 176 74<br>GREECE               | National Ethics Committee<br>284 Mesogion Av.<br>ATHENS, 15562<br>GREECE    |
| 1062 *        | Prof. Lazaros Sichletidis      |                           | Dr. Aikaterini Manika<br>Dr. Dionisis Spyrtos                                                                                                                                                                                                                       | Papanikolaou Hospital<br>University Pneumology Clinic<br>Asvestohori-Eksohi<br>Thessaloniki, 57010<br>GREECE                     | National Ethics Committee<br>284 Mesogion Avenue<br>Athens, 15562<br>GREECE |

090177e181b842ab\Approved\Approved On: 17-Mar-2011 06:18

**India****Coordinating Investigators:**

&lt;None Entered&gt;

| <b><u>Center</u></b> | <b><u>Principal Investigator</u></b>        | <b><u>Co-Investigator(s)</u></b> | <b><u>Sub-Investigator(s)</u></b>                                                                                                                                               | <b><u>Address(es)</u></b>                                                                                                           | <b><u>Institutional Review Board or Ethics Committee Address(es)</u></b>                                                                          |
|----------------------|---------------------------------------------|----------------------------------|---------------------------------------------------------------------------------------------------------------------------------------------------------------------------------|-------------------------------------------------------------------------------------------------------------------------------------|---------------------------------------------------------------------------------------------------------------------------------------------------|
| 1024                 | Dr. Kutumba Srinivasa<br>Sastry Bhagavatula |                                  | Ms. Kundana<br>Gogulamudi<br>Ms. Deepthi Kodali<br>Dr. Srinivas A. Kumar<br>Dr. Nirmal Kumar<br>Ms. Sandhya Rani<br>Ms. Sreelekha<br>Sudanagunta<br>Dr. Suman Vyas<br>Yandamury | Care Hospital, The Institute of<br>Medical Sciences<br>Exhibition Road<br>Nampally<br>Hyderabad, Andhra Pradesh 500<br>001<br>INDIA | Institutional Ethical Committee,<br>CARE Foundation<br>CARE Hospital<br>Road No. 1<br>Banjara Hills<br>Hyderabad, Andhra Pradesh 500 034<br>INDIA |

090177e181b842ab\Approved\Approved On: 17-Mar-2011 06:18



| <u>Center</u> | <u>Principal Investigator</u>                                         | <u>Co-Investigator(s)</u> | <u>Sub-Investigator(s)</u>                                                                                                                                                                                                                                                                                                                                                                                                                                                                                                                                                                                                                                                                                                                                                                                                                                               | <u>Address(es)</u>                                                                                                                                         | <u>Institutional Review Board or Ethics Committee Address(es)</u>                                                                          |
|---------------|-----------------------------------------------------------------------|---------------------------|--------------------------------------------------------------------------------------------------------------------------------------------------------------------------------------------------------------------------------------------------------------------------------------------------------------------------------------------------------------------------------------------------------------------------------------------------------------------------------------------------------------------------------------------------------------------------------------------------------------------------------------------------------------------------------------------------------------------------------------------------------------------------------------------------------------------------------------------------------------------------|------------------------------------------------------------------------------------------------------------------------------------------------------------|--------------------------------------------------------------------------------------------------------------------------------------------|
| 1055          | Dr. Kiron Varghese<br>Dr. Shamanna Seshadhri<br>Iyengar (Previous PI) |                           | Dr. Srilakshmi<br>Mandayam Adhyapak<br>Dr. Mark Christopher<br>Arokiraj<br>Dr. Yeriswamy<br>Mogalahally<br>Channabasappa<br>Dr. Balachandra Sagar<br>Ganapathi<br>Dr. Cherian George<br>Dr. Santosh Mysore<br>Jayadev<br>Ms. Beena Kuttarappally<br>Sebastian<br>Dr. Thirumalesha<br>Rattihalli Lakshmana<br>Setty<br>Dr. Prashanth Devappa<br>Naik<br>Ms. Preethi Muniyappa<br>Narayanappa<br>Ms. Mamatha<br>Kadathanamale<br>Narayanappa<br>Dr. Poonam Nayak<br>Dr. Chandrakanth<br>Bharamagouda Patil<br>Dr. Sandeep Patil<br>Dr. Amar R. Prabhudesai<br>Dr. Blessan Varghese<br>Pulluvilayil<br>Dr. Shilpa Ramesh<br>Dr. Srikanth<br>Secunlapuram Durga<br>Prasad<br>Dr. Sandesh<br>Seetharamappa<br>Dr. Gurappa Gojanur<br>Shetty<br>Ms. Leena Singh<br>Ms. Arpita Taran<br>Dr. Chaya Devarahalli<br>Vasudev<br>Ms. Ashita Yaji<br>Dr. Jayakeerthi<br>Yoganarasimha | St. John's Medical College<br>Hospital<br>Department of Cardiology, III<br>Floor,<br>Sarjapur Road<br>Koramangala<br>Bangalore, Karnataka 560 034<br>INDIA | Institutional Ethical Review Board<br>St. John's Medical College and<br>Hospital<br>Sarjapur Road<br>Bangalore, Karnataka 560 034<br>INDIA |

\* Did not randomize subjects

6-Jan-2011 15:31

| <u>Center</u> | <u>Principal Investigator</u> | <u>Co-Investigator(s)</u> | <u>Sub-Investigator(s)</u>                                                                                                                                                                                                         | <u>Address(es)</u>                                                                                                                                              | <u>Institutional Review Board or Ethics Committee Address(es)</u>                                                                                          |
|---------------|-------------------------------|---------------------------|------------------------------------------------------------------------------------------------------------------------------------------------------------------------------------------------------------------------------------|-----------------------------------------------------------------------------------------------------------------------------------------------------------------|------------------------------------------------------------------------------------------------------------------------------------------------------------|
| 1057          | Dr. Parthiv M. Mehta          |                           | Dr. Roocha Majmundar Mehta<br>Mr. Poonam Nadia<br>Dr. Jigar J. Parikh<br>Dr. Jayesh R. Rawal                                                                                                                                       | Mehta Hospital & Cardiopulmonary Care Center<br>2nd floor, Siddhachal Complex<br>Nr. Doordarshan Kendra<br>Drive-in-Road<br>Ahmedabad, Gujarat 380 054<br>INDIA | Safe Search Independent Ethics Committee<br>Siddhachal Complex, Nr. Doordarshan Kendra<br>Thaltej<br>Ahmedabad, Gujarat 380 054<br>INDIA                   |
| 1058          | Dr. Deepak Talwar             |                           | Mr. Mir Shad Ali<br>Dr. Ramesh Arora<br>Dr. Sharad Joshi<br>Dr. Sandeepan Kumar<br>Dr. Vipul Misra<br>Dr. Deepak Pabreja                                                                                                           | Metro Multispeciality Hospital<br>L-94, Sector 11<br>Noida, Uttar Pradesh 201301<br>INDIA                                                                       | Metro Ethics Review Board<br>Metro Hospitals & Heart Institutes<br>X-1, Sector 12<br>Noida, Uttar Pradesh 201 301<br>INDIA                                 |
| 1059          | Dr. Darshan Banker            |                           | Dr. Nirav Bhalani<br>Dr. Sonia Dalal<br>Mr. Farhain Syed Masoovi<br>Ms. Jesal S. Nanavati<br>Dr. Manoj M. Parmar<br>Dr. Dharmesh Patel<br>Mr. Kamlesh Shah<br>Ms. Toral Sheth<br>Dr. Manoj Subramaniam<br>Dr. Narendrasingh Tanwar | Bankers Heart Institute<br>Near Tagorenagar<br>Opp. Suryakiran Complex<br>Old Padra Road<br>Vadodara, Gujarat 390 015<br>INDIA                                  | Bankers Ethics Committee<br>Bankers Heart Institute<br>Near Tagorenagar<br>Opp. Suryakiran Complex<br>Old Padra Road<br>Vadodara, Gujarat 390 015<br>INDIA |

090177e181b842ab\Approved\Approved On: 17-Mar-2011 06:18

## Italy

## Coordinating Investigators:

&lt;None Entered&gt;

| <u>Center</u> | <u>Principal Investigator</u>                               | <u>Co-Investigator(s)</u> | <u>Sub-Investigator(s)</u>                                                 | <u>Address(es)</u>                                                                                                                                                                                     | <u>Institutional Review Board or Ethics Committee Address(es)</u>                                                                        |
|---------------|-------------------------------------------------------------|---------------------------|----------------------------------------------------------------------------|--------------------------------------------------------------------------------------------------------------------------------------------------------------------------------------------------------|------------------------------------------------------------------------------------------------------------------------------------------|
| 1040          | Prof. Carmine Dario<br>Vizza                                |                           | Dr. Roberto Badagliacca<br>Prof. Francesco Fedele<br>Dr. Roberto Poscia    | Unita' di Ipertensione Polmonare,<br>Dipartimento di Scienze<br>Respiratorie e Cardiovascolari<br>Universita' degli Studi di Roma<br>La Sapienza<br>Viale del Policlinico, 155<br>Roma, 00161<br>ITALY | Comitato Etico Azienda Policlinico<br>Umberto I<br>Viale del Policlinico, 155<br>Roma, 00155<br>ITALY                                    |
| 1043          | Dr. Carlo Campana<br>(Previous PI)<br>Dr. Stefano Ghio      |                           | Giulia Magrini<br>Laura Scelsi<br>Dr. Paolo Vicinelli                      | IRCCS Policlinico San Matteo<br>Dipartimento di Cardiologia<br>Piazzale Golgi, 2<br>Pavia, 27100<br>ITALY                                                                                              | Comitato di Bioetica della<br>Fondazione IRCCS Policlinico S.<br>Matteo di Pavia<br>Viale Golgi, 19<br>Pavia, 27100<br>ITALY             |
| 1067 *        | Dr. Giuseppe Marazzi                                        |                           | Dr Elena Cerquetani<br>Francesco Pelliccia                                 | IRCCS San Raffaele Pisana<br>Dipartimento di Cardiologia<br>Via della Pisana, 235<br>Roma, 00163<br>ITALY                                                                                              | Comitato Etico IRCCS San Raffele<br>Pisana<br>Via di Val Cannuta, 247<br>Roma, 00166<br>ITALY                                            |
| 1089 *        | Dr. Maria Paola Cicini<br>Dr. Pietro Tanzi<br>(Previous PI) |                           | Maria Giuseppina<br>Mastrantuono<br>Dr. Bruno Polletta<br>Dr. Pietro Tanzi | Azienda Ospedaliera San Camillo<br>di Roma<br>Dipartimento Cardio Scienze<br>Cardiologia III<br>Circonvallazione Gianicolense,<br>87<br>Roma, 00152<br>ITALY                                           | Comitato Etico dell'Azienda<br>Ospedaliera San Camillo Forlanini di<br>Roma<br>Circonvallazione Gianicolense, 87<br>Roma, 00152<br>ITALY |

\* Did not randomize subjects

6-Jan-2011 15:31

| <u>Center</u> | <u>Principal Investigator</u> | <u>Co-Investigator(s)</u> | <u>Sub-Investigator(s)</u>             | <u>Address(es)</u>                                                                                                                                     | <u>Institutional Review Board or Ethics Committee Address(es)</u>                                                                                         |
|---------------|-------------------------------|---------------------------|----------------------------------------|--------------------------------------------------------------------------------------------------------------------------------------------------------|-----------------------------------------------------------------------------------------------------------------------------------------------------------|
| 1090 *        | Dr. Patrizio Vitulo           |                           | Dr. Lorenza Conti<br>Dr. Simona Soresi | Servizio di Pneumologia, Istituto Mediterraneo per i Trapianti e Terapie ad Alta Specializzazione<br>Via Ernesto Tricomi, 1<br>Palermo, 90147<br>ITALY | Comitato Etico Istituto Mediterraneo per Trapianti e Terapie Alta Specializzazione ISMETT di Palermo<br>Via Ernesto Tricomi, 1<br>Palermo, 90127<br>ITALY |

090177e181b842ab\Approved\Approved On: 17-Mar-2011 06:18

**Latvia****Coordinating Investigators:**

&lt;None Entered&gt;

| <u>Center</u> | <u>Principal Investigator</u> | <u>Co-Investigator(s)</u> | <u>Sub-Investigator(s)</u>               | <u>Address(es)</u>                                                                                                              | <u>Institutional Review Board or Ethics Committee Address(es)</u>                                                                                                                                              |
|---------------|-------------------------------|---------------------------|------------------------------------------|---------------------------------------------------------------------------------------------------------------------------------|----------------------------------------------------------------------------------------------------------------------------------------------------------------------------------------------------------------|
| 1081          | Prof. Andrejs Erglis          |                           | Dr. Ainars Rudzitis<br>Dr. Andris Skride | P. Stradins Clinical University<br>Hospital / Latvian Centre of<br>Cardiology<br>Pilsonu Street 13<br>Riga, LV - 1002<br>LATVIA | Ethics Committee For Clinical<br>Research of Medicines and<br>Pharmaceutical Products<br>Paula Stradina Clinical University<br>Hospital Development Foundation<br>Pilsonu Street 13<br>Riga, LV 1002<br>LATVIA |

090177e181b842ab\Approved\Approved On: 17-Mar-2011 06:18

**Malaysia****Coordinating Investigators:**

&lt;None Entered&gt;

| <u>Center</u> | <u>Principal Investigator</u>   | <u>Co-Investigator(s)</u> | <u>Sub-Investigator(s)</u>                                 | <u>Address(es)</u>                                                                  | <u>Institutional Review Board or Ethics Committee Address(es)</u>                                                                                  |
|---------------|---------------------------------|---------------------------|------------------------------------------------------------|-------------------------------------------------------------------------------------|----------------------------------------------------------------------------------------------------------------------------------------------------|
| 1096          | Dato' Dr Amin Ariff<br>Nuruddin |                           | Datuk Dr Aizai Azan<br>Abdul Rahim<br>Dr Geetha Kandavello | National Heart Institute<br>145, Jalan Tun Razak<br>Kuala Lumpur, 50400<br>MALAYSIA | Institut Jantung Negara Ethics<br>Committee<br>National Heart Institute<br>145,<br>Jalan Tun Razak<br>Kuala Lumpur, Kuala Lumpur 50400<br>MALAYSIA |

090177e181b842ab\Approved\Approved On: 17-Mar-2011 06:18

## Netherlands

## Coordinating Investigators:

&lt;None Entered&gt;

| <u>Center</u> | <u>Principal Investigator</u> | <u>Co-Investigator(s)</u> | <u>Sub-Investigator(s)</u>         | <u>Address(es)</u>                                                                                     | <u>Institutional Review Board or Ethics Committee Address(es)</u>                                                                                 |
|---------------|-------------------------------|---------------------------|------------------------------------|--------------------------------------------------------------------------------------------------------|---------------------------------------------------------------------------------------------------------------------------------------------------|
| 1018          | Dr. Anko Boonstra             |                           | Dr. Antonie Vonk<br>Noordergraaf   | VU Medisch Centrum / afdeling<br>Longziekten<br>De Boelelaan 1117<br>Amsterdam, 1081 HV<br>NETHERLANDS | Vrije Universiteit Medisch Centrum<br>Medisch Ethische<br>Toetsingscommissie<br>6 Z 192<br>De Boelelaan 1117<br>Amsterdam, 1081 HV<br>NETHERLANDS |
| 1065          | Dr. Leon M. van den<br>Toorn  |                           | Dr. Marlies Wijsenbeek-<br>Lourens | Erasmus MC<br>Kamer SV-017<br>Dr. Molenwaterplein 40<br>Rotterdam, 3015 GE<br>NETHERLANDS              | Vrije Universiteit Medisch Centrum<br>Medisch Ethische<br>Toetsingscommissie<br>6 Z 192<br>De Boelelaan 1117<br>Amsterdam, 1081 HV<br>NETHERLANDS |

090177e181b842ab\Approved\Approved On: 17-Mar-2011 06:18

**Panama****Coordinating Investigators:**

&lt;None Entered&gt;

| <u>Center</u> | <u>Principal Investigator</u> | <u>Co-Investigator(s)</u> | <u>Sub-Investigator(s)</u> | <u>Address(es)</u>                                                                                                            | <u>Institutional Review Board or Ethics Committee Address(es)</u>                                                                                               |
|---------------|-------------------------------|---------------------------|----------------------------|-------------------------------------------------------------------------------------------------------------------------------|-----------------------------------------------------------------------------------------------------------------------------------------------------------------|
| 1100 *        | Daniel Pichel                 |                           | Rafael Restrepo            | Cardiologos Asociados de Panama<br>Consultorios Medicos Paitilla<br>Calle 53, Avenida Balboa<br>Panama City, Panama<br>PANAMA | Instituto Conmemorativo Gorgas<br>Comite Nacional de Bioetica en<br>Investigacion<br>AV. Justo Arosemena<br>calle 35 y 36<br>Panama City, Panama 6991<br>PANAMA |

090177e181b842ab\Approved\Approved On: 17-Mar-2011 06:18



**Philippines****Coordinating Investigators:**

&lt;None Entered&gt;

| <u>Center</u> | <u>Principal Investigator</u> | <u>Co-Investigator(s)</u> | <u>Sub-Investigator(s)</u> | <u>Address(es)</u>                                                                                                                                                                             | <u>Institutional Review Board or Ethics Committee Address(es)</u>                                                                                                                                  |
|---------------|-------------------------------|---------------------------|----------------------------|------------------------------------------------------------------------------------------------------------------------------------------------------------------------------------------------|----------------------------------------------------------------------------------------------------------------------------------------------------------------------------------------------------|
| 1082          | Dr. Ma. Encarnita B. Limpin   |                           | Dr. Erma D. Garcia-Lazaro  | Philippine Heart Center<br>Pulmonary Rehabilitation Section<br>8th Floor Medical Arts Building<br>East Avenue<br>Quezon City, 1100<br>PHILIPPINES                                              | Philippine Heart Center-Institutional Review Board<br>Philippine Heart Center<br>8th Floor Medical Arts Building<br>East Avenue<br>Quezon City, 1100<br>PHILIPPINES                                |
| 1087          | Dr. Jubert P. Benedicto       |                           | Dr Norman L. Maghuyop      | Philippine General Hospital<br>Central Adult and Pediatric Intensive Care Unit<br>2nd Floor Central Block Building<br>Pedro Gil Street, Ermita Taft Avenue<br>Manila City, 1000<br>PHILIPPINES | Research Implementation and Development Office<br>Philippine General Hospital- UP College of Medicine<br>547 Floor Paz Mendoza Building<br>Pedro Gil Street, Ermita<br>Manila, 1000<br>PHILIPPINES |

090177e181b842ab\Approved\Approved On: 17-Mar-2011 06:18

**Poland****Coordinating Investigators:**

&lt;None Entered&gt;

| <u>Center</u> | <u>Principal Investigator</u> | <u>Co-Investigator(s)</u> | <u>Sub-Investigator(s)</u>                                                                                                        | <u>Address(es)</u>                                                                                                                                                                                                                       | <u>Institutional Review Board or Ethics Committee Address(es)</u>                                                             |
|---------------|-------------------------------|---------------------------|-----------------------------------------------------------------------------------------------------------------------------------|------------------------------------------------------------------------------------------------------------------------------------------------------------------------------------------------------------------------------------------|-------------------------------------------------------------------------------------------------------------------------------|
| 1036 *        | Dr. Marcin Kurzyna            |                           | Dr. Anna Fijalkowska<br>Dr. Michal Florczyk<br>Dr. Maria Wieteska                                                                 | Instytut Gruźlicy i Chorob Płuc<br>Klinika Chorob Wewnętrznych<br>Klatki Piersiowej<br>ul. Płocka 26<br>Warszawa, 01-138<br>POLAND                                                                                                       | Komisja ds. Etyki Badan Naukowych<br>Przy Instytucie Gruźlicy i Chorob<br>Płuc<br>ul. Płocka 26<br>Warszawa, 01-138<br>POLAND |
| 1037          | Prof. Piotr Podolec           |                           | Dr. Magdalena Kaznica<br>Dr. Magdalena Nowacka<br>Dr. Wiesława Tracz<br>Dr. Piotr Wilkolek<br>Magdalena Wojtowicz-<br>Kaczmarczyk | Krakowski Szpital<br>Specjalistyczny Im. Jana Pawła II<br>w Krakowie<br>Oddział Kliniczny Chorob Serca<br>i Naczyn<br>Ul. Pradnicka 80<br>Krakow, 31-202<br>POLAND                                                                       | Komisja ds. Etyki Badan Naukowych<br>Przy Instytucie Gruźlicy i Chorob<br>Płuc<br>ul. Płocka 26<br>Warszawa, 01-138<br>POLAND |
| 1071 *        | Prof. Lech Polonski           |                           | Dr. Bartosz Hudzik<br>Dr. Anna Kazik<br>Dr. Mateusz Ostrega<br>Dr. Jacek Piegza                                                   | Samodzielny Publiczny Zakład<br>Opieki Zdrowotnej, Śląskie<br>Centrum Chorob Serca<br>III Katedra i Oddział Kliniczny<br>Kardiologii Śląskiego<br>Uniwersytetu Medycznego w<br>Katowicach<br>Ul. Szpitalna 2<br>Zabrze, 41-800<br>POLAND | Komisja ds. Etyki Badan Naukowych<br>Przy Instytucie Gruźlicy i Chorob<br>Płuc<br>ul. Płocka 26<br>Warszawa, 01-138<br>POLAND |

**Romania****Coordinating Investigators:**

&lt;None Entered&gt;

| <u>Center</u> | <u>Principal Investigator</u>      | <u>Co-Investigator(s)</u> | <u>Sub-Investigator(s)</u>                                             | <u>Address(es)</u>                                                                                                                          | <u>Institutional Review Board or Ethics Committee Address(es)</u>                                                                                                                   |
|---------------|------------------------------------|---------------------------|------------------------------------------------------------------------|---------------------------------------------------------------------------------------------------------------------------------------------|-------------------------------------------------------------------------------------------------------------------------------------------------------------------------------------|
| 1097          | Prof.Dr. Voicu Mircea<br>Tudorache |                           | Dr. Nicoleta Sorina<br>Bertici<br>Dr. Ionela Iovan<br>Dr. Dorin Vancea | Spitalul Clinic de Boli Infectioase<br>si Pneumoftiziologie Dr. Victor<br>Babes<br>Str. Gheorghe Adam nr. 13<br>Timisoara, Timis<br>ROMANIA | Academia de Stiinte<br>Medicale,Comisia Nationala de Etica<br>pentru Studiul Clinic al<br>Medicamentului<br>Str. Av. Sanatescu nr. 48,<br>Sector 1,<br>Bucuresti, 011478<br>ROMANIA |
| 1099 *        | Prof.Dr. Traian Mihaescu           |                           | Raluca Mihaela Bercea<br>Dr. Anda Tesloianu                            | Spitalul Clinic de<br>Pneumoftiziologie<br>Str.Iosif Cihac, nr 30<br>Iasi, Iasi 700115<br>ROMANIA                                           | Academia de Stiinte<br>Medicale,Comisia Nationala de Etica<br>pentru Studiul Clinic al<br>Medicamentului<br>Str. Av. Sanatescu nr. 48,<br>Sector 1,<br>Bucuresti, 011478<br>ROMANIA |

090177e181b842ab\Approved\Approved On: 17-Mar-2011 06:18

**Russian Federation****Coordinating Investigators:**

&lt;None Entered&gt;

| <u>Center</u> | <u>Principal Investigator</u> | <u>Co-Investigator(s)</u> | <u>Sub-Investigator(s)</u>                                             | <u>Address(es)</u>                                                                                                                                                                                                                                                                                                                                                                                                                                                                                                                                                                                                                    | <u>Institutional Review Board or Ethics Committee Address(es)</u>                                                                                                                                                                                                                                                                                                  |
|---------------|-------------------------------|---------------------------|------------------------------------------------------------------------|---------------------------------------------------------------------------------------------------------------------------------------------------------------------------------------------------------------------------------------------------------------------------------------------------------------------------------------------------------------------------------------------------------------------------------------------------------------------------------------------------------------------------------------------------------------------------------------------------------------------------------------|--------------------------------------------------------------------------------------------------------------------------------------------------------------------------------------------------------------------------------------------------------------------------------------------------------------------------------------------------------------------|
| 1045 *        | Dr. Evgene N. Semernin        |                           | Dr. Alexandra Y. Gudkova<br>Dr. Svetlana Kozlova<br>Dr. Raisa Polozova | Almazov Federal Heart, Blood and Endocrinology Centre<br>2, Akkuratova str.<br>Saint-Petersburg, 197341<br>RUSSIAN FEDERATION<br><br>Almazov Federal Heart, Blood and Endocrinology Centre<br>Clinical-Rehabilitation complex<br>15, Parkhomenko str.<br>Saint-Petersburg, 194156<br>RUSSIAN FEDERATION<br><br>Almazov Federal Heart, Blood and Endocrinology Centre<br>Cardio Surgery unit<br>1, Severniy prospect.<br>Saint-Petersburg, 194354<br>RUSSIAN FEDERATION<br><br>S-Petersburg State Medical<br>University named after academic<br>I.P. Pavlov<br>Lva Tolstogo str. 6/8<br>Saint-Petersburg, 197022<br>RUSSIAN FEDERATION | Ethics Committee<br>Saint-Petersburg State Medical<br>University named after I.P. Pavlov of<br>Roszdrav<br>Roentgen str., 10<br>Saint-Petersburg, 197101<br>RUSSIAN FEDERATION<br><br>Ethics Committee within the Federal<br>Authority for Healthcare and Social<br>Development Regulation<br>8, str. 2, Petrovskij bulvar<br>Moscow, 127051<br>RUSSIAN FEDERATION |

\* Did not randomize subjects

| <u>Center</u> | <u>Principal Investigator</u> | <u>Co-Investigator(s)</u> | <u>Sub-Investigator(s)</u>                                                                        | <u>Address(es)</u>                                                                                                                                                                                                                                       | <u>Institutional Review Board or Ethics Committee Address(es)</u>                                                                                                                                                                                                                             |
|---------------|-------------------------------|---------------------------|---------------------------------------------------------------------------------------------------|----------------------------------------------------------------------------------------------------------------------------------------------------------------------------------------------------------------------------------------------------------|-----------------------------------------------------------------------------------------------------------------------------------------------------------------------------------------------------------------------------------------------------------------------------------------------|
| 1046          | Prof. Sergey V. Gorbachevsky  |                           | Dr. Victoriya Victorovna Sheverdina<br>Dr. Karina Y. Tatevosyan                                   | Scientific Center of Cardiovascular surgery n.a. A.N.Bakoulev RAMS Rublevskoye shosse, 135 Moscow, 121552 RUSSIAN FEDERATION<br><br>Scientific Center of Cardiovascular surgery n.a. A.N.Bakoulev RAMS Leninskiy pr. 8 Moscow, 117931 RUSSIAN FEDERATION | Ethics Committee within the Federal Authority for Healthcare and Social Development Regulation 8, str. 2, Petrovskij bulvar Moscow, 127051 RUSSIAN FEDERATION                                                                                                                                 |
| 1083 *        | Prof. Vitaly Berezin          |                           | Nataliya A. Egorova<br>Natalia G. Kuleshova<br>Viktoria V. Vereshchagina<br>Valery S. Verkhovskiy | Saint Petersburg's City Hospital #26, Department of Cardiology #2.<br>2. Kostyushko str. Saint Petersburg, 196247 RUSSIAN FEDERATION                                                                                                                     | Ethics Committee of Saint Petersburg's City Hospital #26 Ulitsa Kostushko, 2 Saint Petersburg, 196247 RUSSIAN FEDERATION<br><br>Ethics Committee within the Federal Authority for Healthcare and Social Development Regulation 8, str. 2, Petrovskij bulvar Moscow, 127051 RUSSIAN FEDERATION |

**Thailand****Coordinating Investigators:**

&lt;None Entered&gt;

| <u>Center</u> | <u>Principal Investigator</u> | <u>Co-Investigator(s)</u> | <u>Sub-Investigator(s)</u>                                                                                | <u>Address(es)</u>                                                                                                                                                                        | <u>Institutional Review Board or Ethics Committee Address(es)</u>                                                                                                                      |
|---------------|-------------------------------|---------------------------|-----------------------------------------------------------------------------------------------------------|-------------------------------------------------------------------------------------------------------------------------------------------------------------------------------------------|----------------------------------------------------------------------------------------------------------------------------------------------------------------------------------------|
| 1093          | Prof. Ratanavadee Nanagara    |                           | Assist.Prof Chingching Foocharoen<br>Assist.Prof. Ajanee Mahakkanukrauh<br>Assoc.Prof Siraphop Suwannaroj | Division of Rheumatology Allergy and Immunology, Department of Medicine, Faculty of Medicine<br>Khon Kaen University<br>123 Mitraparb Road,<br>Amphoe Mueang, Khon Kaen 40002<br>THAILAND | The Khon Kaen University Ethics Committee for Human Research<br>Faculty of Medicine, Khon Kaen University<br>Dean Office 6 floor<br>123 Mitraphap Road<br>Khon Kaen, 40200<br>THAILAND |
| 1094          | Dr. Taworn Suithichaiyakul    |                           |                                                                                                           | Department of Medicine, Chulalongkorn University<br>1873 Rama 4 Road, Pathumwan Bangkok, Thailand 10330<br>THAILAND                                                                       | Institutional Review Board, Faculty of Medicine, Chulalongkorn University<br>1873 Rama IV Road<br>Pathumwan<br>Bangkok, Bangkok 10330<br>THAILAND                                      |

090177e181b842ab\Approved\Approved On: 17-Mar-2011 06:18

**United Kingdom****Coordinating Investigators:**

&lt;None Entered&gt;

| <u>Center</u> | <u>Principal Investigator</u> | <u>Co-Investigator(s)</u> | <u>Sub-Investigator(s)</u>                                             | <u>Address(es)</u>                                                                                                                                                                        | <u>Institutional Review Board or Ethics Committee Address(es)</u>                                                                                     |
|---------------|-------------------------------|---------------------------|------------------------------------------------------------------------|-------------------------------------------------------------------------------------------------------------------------------------------------------------------------------------------|-------------------------------------------------------------------------------------------------------------------------------------------------------|
| 1085          | Professor Paul A. Corris      |                           | Dr. Andrew J. Fisher<br>Dr. James L. Lordan<br>Dr. Guy Andrew Macgowan | Room 224A Sir William Leech Centre<br>Freeman Hospital<br>Freeman Road<br>Newcastle Upon Tyne, Tyne and Wear NE7 7DN<br>UNITED KINGDOM                                                    | South West 2 REC<br>Royal Devon & Exeter Hospital (Heavitree)<br>Research Ethics Service<br>Gladstone Road<br>Exeter, Devon EX1 2ED<br>UNITED KINGDOM |
| 1088          | Dr. Leisa Freeman             |                           | Dr. Alice L. Wood                                                      | Norfolk and Norwich University Hospital<br>Clinical Research and Trials Unit<br>Cardiology Department<br>Level 3, East Block<br>Colney Lane<br>Norwich, Norfolk NR4 7UY<br>UNITED KINGDOM | South West 2 REC<br>Royal Devon & Exeter Hospital (Heavitree)<br>Research Ethics Service<br>Gladstone Road<br>Exeter, Devon EX1 2ED<br>UNITED KINGDOM |

090177e181b842ab\Approved\Approved On: 17-Mar-2011 06:18

## United States

## Coordinating Investigators:

&lt;None Entered&gt;

| <u>Center</u> | <u>Principal Investigator</u>   | <u>Co-Investigator(s)</u> | <u>Sub-Investigator(s)</u>                                                                       | <u>Address(es)</u>                                                                                                                                                                                                      | <u>Institutional Review Board or Ethics Committee Address(es)</u>                                                                                                                               |
|---------------|---------------------------------|---------------------------|--------------------------------------------------------------------------------------------------|-------------------------------------------------------------------------------------------------------------------------------------------------------------------------------------------------------------------------|-------------------------------------------------------------------------------------------------------------------------------------------------------------------------------------------------|
| 1013 *        | Dr. Paul Bennett<br>deBoisblanc |                           | Dr. Suma D. Jain<br>Dr. Hamang M. Patel<br>Dr. Warren R. Summer<br>Dr. Hector Osvaldo<br>Ventura | LSUHSC<br>Room 6B1<br>1900 Gravier Street<br>New Orleans, LA 70112<br>UNITED STATES<br><br>Medical Center of Louisiana -<br>University Hospital - CTRC<br>2021 Gravier Street<br>New Orleans, LA 70112<br>UNITED STATES | LSU Health Sciences Center<br>Institutional Review Board<br>433 Bolivar Street<br>New Orleans, LA 70112<br>UNITED STATES                                                                        |
| 1016          | Dr. Robert Michael Aris         |                           | Dr. Hubert James Ford                                                                            | The University of North Carolina<br>at Chapel Hill<br>4th Floor BioInformatics<br>Building<br>CB# 7020<br>130 Mason Farm Road<br>Chapel Hill, NC 27599<br>UNITED STATES                                                 | Office of Human Research Ethics<br>(OHRE)<br>BioMedical Institute Review Board<br>CB #7097<br>Medical School Building 52<br>Chapel Hill, NC 27599-7097<br>UNITED STATES                         |
| 1017 *        | Dr. Roblee Peter Allen          |                           | Dr. Timothy Eugene<br>Albertson<br>Dr. Mark V. Avdalovic                                         | University of California Davis<br>Medical Center<br>Suite 3400<br>4150 V Street<br>Sacramento, CA 95817<br>UNITED STATES                                                                                                | University of California Davis<br>Institutional Review Board<br>University of California Medical<br>Center - Crisp Building<br>2921 Stockton Boulevard<br>Sacramento, CA 95817<br>UNITED STATES |



| <u>Center</u> | <u>Principal Investigator</u> | <u>Co-Investigator(s)</u> | <u>Sub-Investigator(s)</u>                             | <u>Address(es)</u>                                                                                                                                                                                                        | <u>Institutional Review Board or Ethics Committee Address(es)</u>                                                                                 |
|---------------|-------------------------------|---------------------------|--------------------------------------------------------|---------------------------------------------------------------------------------------------------------------------------------------------------------------------------------------------------------------------------|---------------------------------------------------------------------------------------------------------------------------------------------------|
| 1021          | Dr. Zeenat Safdar             |                           | Dr. Wayne J. Franklin<br>Dr. Adaani Ethel Frost        | Baylor College of Medicine<br>Pulmonary Section<br>Suite 1225<br>6620 Main Street<br>Houston, TX 77030<br>UNITED STATES<br><br>St. Luke's Episcopal Hospital<br>6720 Bertner Avenue<br>Houston, TX 77030<br>UNITED STATES | BCM Office of Research<br>Institutional Review Board for<br>Human Subjects<br>Room 600D<br>One Baylor Plaza<br>Houston, TX 77030<br>UNITED STATES |
| 1030          | Dr. Jeremy P Feldman          |                           | Dr. Gregory Scott Ahearn<br>Dr. Shawn E. Wright        | Arizona Pulmonary Specialists,<br>LTD<br>Suite 950<br>500 West Thomas Road<br>Phoenix, AZ 85013<br>UNITED STATES                                                                                                          | Western Institutional Review Board,<br>Inc.<br>3535 Seventh Avenue, SouthWest<br>Olympia, WA 98502<br>UNITED STATES                               |
| 1031          | Dr. Boaz A. Markewitz         |                           | Dr. Nathan D. Hatton<br>Dr. Ernst-Gilbert<br>Schreiber | University of Utah Sciences<br>Center<br>50 North Medical Drive<br>Salt Lake City, UT 84132<br>UNITED STATES                                                                                                              | University of Utah IRB<br>512 RAB<br>75 South 2000 East<br>Salt Lake City, UT 84112<br>UNITED STATES                                              |

090177e181b842ab\Approved\Approved On: 17-Mar-2011 06:18

| <u>Center</u> | <u>Principal Investigator</u>                                        | <u>Co-Investigator(s)</u> | <u>Sub-Investigator(s)</u>                                                                                                                                                                                                                         | <u>Address(es)</u>                                                                                                                                                                                                                                                                                                                                                                                                                                                                       | <u>Institutional Review Board or Ethics Committee Address(es)</u>                                                                    |
|---------------|----------------------------------------------------------------------|---------------------------|----------------------------------------------------------------------------------------------------------------------------------------------------------------------------------------------------------------------------------------------------|------------------------------------------------------------------------------------------------------------------------------------------------------------------------------------------------------------------------------------------------------------------------------------------------------------------------------------------------------------------------------------------------------------------------------------------------------------------------------------------|--------------------------------------------------------------------------------------------------------------------------------------|
| 1032          | Dr. Jamie Cooper Hey                                                 |                           | Dr. Glenn Matthew Giessel<br>Dr. Shaival J. Kapadia<br>Dr. Ritsu Kuno<br>Dr. James A.L. Mathers<br>Dr. Calvin Mark Newton<br>Dr. Michael B. Polsky<br>Dr. Cullen B. Rivers<br>Dr. Pawanjit S. Sarna<br>Dr. Rodney H. Smith<br>Dr. Peter F. Torrasi | Cardiovascular Associates of Virginia<br>Imaging Only<br>Suite 200<br>7001 Forest Avenue<br>Richmond, VA 23230<br>UNITED STATES<br><br>CJW Chippenham Medical Center<br>7101 Jahnke Road<br>Richmond, VA 23225<br>UNITED STATES<br><br>Pulmonary Associates of Richmond, Inc.<br>Suite 201<br>1000 Boulders Parkway<br>Richmond, VA 23225<br>UNITED STATES<br><br>Virginia Cardiovascular Specialists<br>Suite 100<br>7401 Beaufont Springs Drive<br>Richmond, VA 23225<br>UNITED STATES | Chippenham & Johnston-Willis Medical Center<br>Institutional Review Board<br>7101 Jahnke Road<br>Richmond, VA 23225<br>UNITED STATES |
| 1048 *        | Dr. Nathaniel Marchetti (Previous PI)<br>Dr. Sheila Elizabeth Weaver |                           | Dr. Francis Chan Cordova<br>Dr. Gerard Joseph Criner<br>Dr. Nathaniel Marchetti<br>Dr. Brian O'Murchu                                                                                                                                              | Temple Lung Center<br>Parkinson Pavilion, 7th Floor<br>3401 North Broad Street<br>Philadelphia, PA 19140<br>UNITED STATES<br><br>Temple University Hospital<br>3401 North Broad Street<br>Philadelphia, PA 19140<br>UNITED STATES                                                                                                                                                                                                                                                        | Western Institutional Review Board<br>3535 Seventh Avenue Southwest<br>Olympia, WA 98502<br>UNITED STATES                            |

090177e181b842ab\Approved\Approved On: 17-Mar-2011 06:18

\* Did not randomize subjects

| <u>Center</u> | <u>Principal Investigator</u>  | <u>Co-Investigator(s)</u> | <u>Sub-Investigator(s)</u>                                                                 | <u>Address(es)</u>                                                                                                                                                                                                                        | <u>Institutional Review Board or Ethics Committee Address(es)</u>                                                       |
|---------------|--------------------------------|---------------------------|--------------------------------------------------------------------------------------------|-------------------------------------------------------------------------------------------------------------------------------------------------------------------------------------------------------------------------------------------|-------------------------------------------------------------------------------------------------------------------------|
| 1050 *        | Dr. Adam Lawrence<br>Greene    |                           | Dr. David C. Mares                                                                         | Saint John's Research Institute<br>Suite 110<br>2020 Meridian Street<br>Anderson, IN 46016<br>UNITED STATES                                                                                                                               | St. Vincent Institutional Review<br>Board<br>Suite 208<br>8402 Harcourt Road<br>Indianapolis, IN 46260<br>UNITED STATES |
| 1052 *        | Dr. Daniel Stevens<br>Fuleihan |                           | Dr. Ziad A. El-Khally<br>Robert D. Kirk                                                    | New York Heart Center<br>Suite 300<br>1000 East Genesee Street<br>Syracuse, NY 13210<br>UNITED STATES                                                                                                                                     | Saint Joseph's Hospital<br>Human Research Committee<br>301 Prospect Avenue<br>Syracuse, NY 13203<br>UNITED STATES       |
| 1053          | Dr. Anantharam V. Kalya        |                           | Kristen L. Combes<br>Nadine C. Henning<br>Dr. Thomas P. Schleeter<br>Dr. Mary Norine Walsh | The Care Group, LLC<br>8333 Naab Road<br>Indianapolis, IN 46260<br>UNITED STATES                                                                                                                                                          | Western Institutional Review Board,<br>Inc.<br>3535 Seventh Avenue SW<br>Olympia, WA 98502-5010<br>UNITED STATES        |
| 1054 *        | Dr. Mohammad Waseem<br>Farra   |                           | Dr. Harvey W. Organek                                                                      | Consultants in Sleep and<br>Pulmonary Medicine<br>28200 Franklin Road<br>Southfield, MI 48034<br>UNITED STATES<br><br>United Physicians Research<br>Institute<br>Suite 2800<br>30800 Telegraph Road<br>Bingham, MI 48025<br>UNITED STATES | United Physicians Research IRB<br>Suite 2800<br>30800 Telegraph Road<br>Bingham Farms, MI 48025<br>UNITED STATES        |

| <u>Center</u> | <u>Principal Investigator</u> | <u>Co-Investigator(s)</u> | <u>Sub-Investigator(s)</u>                                                                            | <u>Address(es)</u>                                                                                                                                             | <u>Institutional Review Board or Ethics Committee Address(es)</u>                                                                                                                          |
|---------------|-------------------------------|---------------------------|-------------------------------------------------------------------------------------------------------|----------------------------------------------------------------------------------------------------------------------------------------------------------------|--------------------------------------------------------------------------------------------------------------------------------------------------------------------------------------------|
| 1063          | Dr. Jeffrey Evan Michaelson   |                           | Dr. Susanti R. Ie<br>Dr. Rana Rab-Hasan<br>Dr. Steven Michael Rosenthal<br>Dr. Chuansheng Jonathon Wu | Atlanta Institute for Medical Research, Inc.<br>Suite 220<br>495 Winn Way<br>Decatur, GA 30030<br>UNITED STATES                                                | Western Institutional Review Board<br>3535 Seventh Avenue Southwest<br>Olympia, WA 98502<br>UNITED STATES                                                                                  |
| 1064          | Dr. James R. Gossage          |                           | Dr. Amy Renee Blanchard                                                                               | Medical College of Georgia<br>BBR 5513<br>1120 15th Street<br>Augusta, GA 30912<br>UNITED STATES                                                               | Human Assurance Committee<br>Medical College of Georgia<br>CJ-2103<br>1120 15th Street<br>Augusta, GA 30912<br>UNITED STATES                                                               |
| 1066 *        | Dr. David H. Silber           |                           | Dr. John Phillip Boehmer<br>Patricia M. Frey<br>Laurie S. Huddy                                       | Penn States Milton S. Hershey Medical Center<br>Heart and Vascular Insititute,<br>Mail Code H047<br>500 University Drive<br>Hershey, PA 17033<br>UNITED STATES | Penn State Milton S. Hershey Medical Center<br>Human Subjects Protection Office/Institutional Review Board<br>Mail Code A115<br>600 Centerview Drive<br>Hershey, PA 17033<br>UNITED STATES |
| 1068 *        | Dr. Lev Mark Khitin           |                           | Dr. Yan Katsnelson                                                                                    | Chicago Heart Institute<br>Suite 201<br>800 Biesterfield Road<br>Elk Grove Village, IL 60007<br>UNITED STATES                                                  | Western Institutional Review Board<br>3535 Seventh Avenue Southwest<br>Olympia, WA 98502<br>UNITED STATES                                                                                  |

| <u>Center</u> | <u>Principal Investigator</u> | <u>Co-Investigator(s)</u> | <u>Sub-Investigator(s)</u>                                                                                                    | <u>Address(es)</u>                                                                                                                                                                                                | <u>Institutional Review Board or Ethics Committee Address(es)</u>                                            |
|---------------|-------------------------------|---------------------------|-------------------------------------------------------------------------------------------------------------------------------|-------------------------------------------------------------------------------------------------------------------------------------------------------------------------------------------------------------------|--------------------------------------------------------------------------------------------------------------|
| 1077          | Dr. Kevin Cronin<br>Sharkey   |                           | Dr. John Edward<br>Alexander<br>Dr. Edward Beman<br>McMillan                                                                  | Mid Carolina Cardiology<br>Suite 501 and Suite 605<br>1718 East Fourth Street<br>Charlotte, NC 28204<br>UNITED STATES<br><br>Presbyterian Hospital<br>200 Hawthorne Lane<br>Charlotte, NC 28204<br>UNITED STATES  | Presbyterian Hospital IRB<br>PO Box 33549<br>200 Hawthorne Lane<br>Charlotte, NC 28233-3549<br>UNITED STATES |
| 1078 *        | Dr. Ronald T. Uszenski        |                           | Dr. Jonathan Eliot Este<br>Fisher<br>Dr. George Vernon Irons<br>Jr.<br>Dr. James David Kay<br>Dr. Kenneth Durham<br>Weeks Jr. | Mid Carolina Cardiology<br>Suite 201<br>10030 Gilead Road<br>Huntersville, NC 28078<br>UNITED STATES<br><br>Presbyterian Hospital<br>Huntersville<br>10030 Gilead Road<br>Huntersville, NC 28078<br>UNITED STATES | Presbyterian Hospital IRB<br>PO Box 33549<br>200 Hawthorne Lane<br>Charlotte, NC 28233-3549<br>UNITED STATES |

090177e181b842ab\Approved\Approved On: 17-Mar-2011 06:18
